# Supplementary material
Source: PubMed Central journal article supplement (PMC3001590)
Supplement: supp_ehq355_ehq355_tables.pdf [file supp_ehq355_ehq355_tables.pdf]

**Table S1. Quartiles of BMI by quartiles of waist circumference, DXA fat mass and leptin concentration**

|                            |                 | BMI quartiles   |             |                 |             |                 |             |                 |             |  |
|----------------------------|-----------------|-----------------|-------------|-----------------|-------------|-----------------|-------------|-----------------|-------------|--|
| Other adiposity            |                 | 1 <sup>st</sup> |             | 2 <sup>nd</sup> |             | 3 <sup>rd</sup> |             | 4 <sup>th</sup> |             |  |
| measures' quartiles        |                 | n               | %           | n               | %           | n               | %           | n               | %           |  |
| <b>Waist circumference</b> |                 |                 |             |                 |             |                 |             |                 |             |  |
|                            | 1 <sup>st</sup> | 1,346           | <b>71.0</b> | 522             | 27.6        | 86              | 4.5         | 1               | 0.1         |  |
|                            | 2 <sup>nd</sup> | 488             | 25.7        | 900             | <b>47.5</b> | 458             | 24.2        | 22              | 1.2         |  |
|                            | 3 <sup>rd</sup> | 61              | 3.2         | 463             | 24.5        | 1,053           | <b>55.6</b> | 306             | 16.1        |  |
|                            | 4 <sup>th</sup> | 1               | 0.1         | 9               | 0.5         | 297             | 15.7        | 1,567           | <b>82.7</b> |  |
| <b>Dxa total fat*</b>      |                 |                 |             |                 |             |                 |             |                 |             |  |
|                            | 1 <sup>st</sup> | 1,241           | <b>68.9</b> | 491             | 27.2        | 73              | 4.0         | 0               | 0.0         |  |
|                            | 2 <sup>nd</sup> | 516             | 28.6        | 898             | <b>49.8</b> | 382             | 21.2        | 10              | 0.6         |  |
|                            | 3 <sup>rd</sup> | 45              | 2.5         | 410             | 22.7        | 1,097           | <b>60.8</b> | 253             | 14.0        |  |
|                            | 4 <sup>th</sup> | 0               | 0.0         | 5               | 0.3         | 253             | 14.0        | 1,546           | <b>85.5</b> |  |
| <b>Leptin*</b>             |                 |                 |             |                 |             |                 |             |                 |             |  |
|                            | 1 <sup>st</sup> | 693             | <b>54.1</b> | 432             | 33.9        | 158             | 12.3        | 8               | 0.7         |  |
|                            | 2 <sup>nd</sup> | 426             | 33.3        | 483             | <b>37.9</b> | 292             | 22.8        | 47              | 4.0         |  |
|                            | 3 <sup>rd</sup> | 132             | 10.3        | 293             | 23.0        | 569             | <b>44.4</b> | 239             | 20.5        |  |
|                            | 4 <sup>th</sup> | 29              | 2.3         | 66              | 5.2         | 262             | 20.5        | 871             | <b>74.8</b> |  |

\*log transformed
