# Supplementary material
Source: PubMed Central journal article supplement (PMC3001590)

**Figure S1. Flow chart of participants included in the study.**

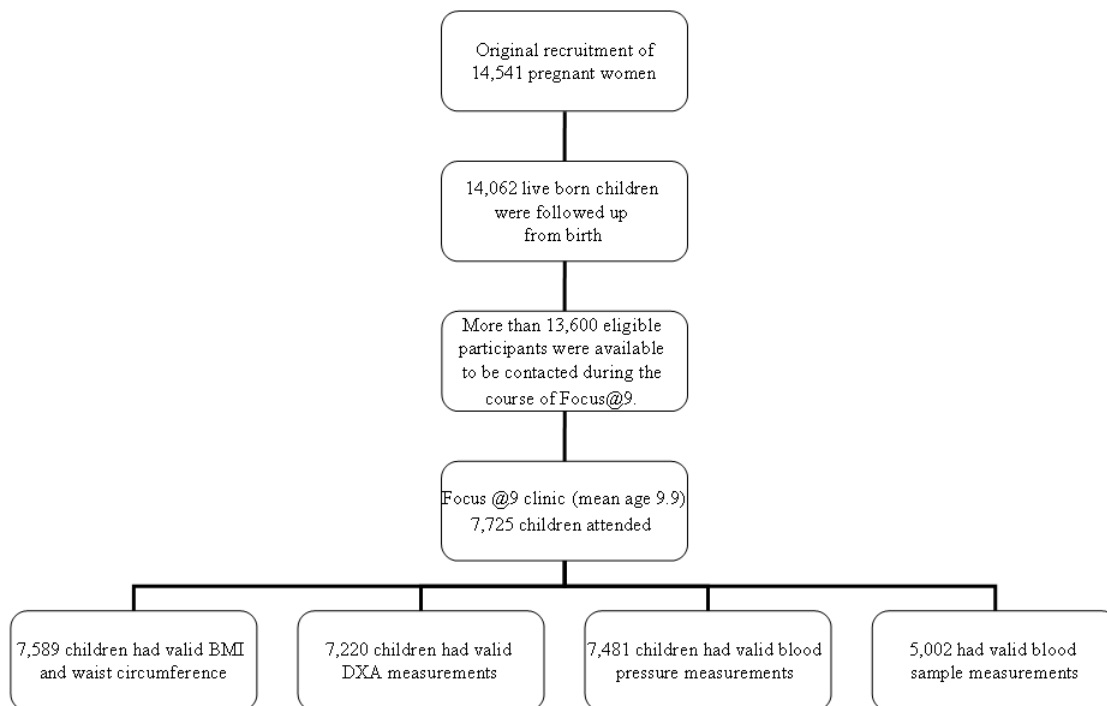

Supplement: supp_ehq355_ehq355_figs.pdf [file supp_ehq355_ehq355_figs.pdf]
